RESEARCH ARTICLE

# The different course of alcoholic and idiopathic chronic pancreatitis: A long-term study of 2,037 patients

Lu Hao<sup>1,2</sup>✉, Li-Sheng Wang<sup>3</sup>✉, Yu Liu<sup>1</sup>✉, Teng Wang<sup>1,2</sup>, Hong-Lei Guo<sup>1</sup>, Jun Pan<sup>1</sup>, Dan Wang<sup>1</sup>, Ya-Wei Bi<sup>1</sup>, Jun-Tao Ji<sup>2</sup>, Lei Xin<sup>1,2</sup>, Ting-Ting Du<sup>1</sup>, Jin-Huan Lin<sup>1</sup>, Di Zhang<sup>1</sup>, Xiang-Peng Zeng<sup>1</sup>, Wen-Bin Zou<sup>1</sup>, Hui Chen<sup>1,2</sup>, Ting Xie<sup>4</sup>, Bai-Rong Li<sup>5</sup>, Zhuan Liao<sup>1,2</sup>, Zhi-Jie Cong<sup>6</sup>, Zheng-Lei Xu<sup>3\*</sup>, Zhao-Shen Li<sup>1,2\*</sup>, Liang-Hao Hu<sup>1,2\*</sup>

**1** Department of Gastroenterology, Changhai Hospital, The Second Military Medical University, Shanghai, China, **2** Digestive Endoscopy Center, Changhai Hospital, The Second Military Medical University, Shanghai, China, **3** Department of Gastroenterology, The Second Clinical Medical College (Shenzhen People's Hospital), Jinan University, Guangdong, China, **4** Department of Gastroenterology, Zhongda Hospital, Southeast University, Nanjing, China, **5** Department of Gastroenterology, Air Force General Hospital, Beijing, China, **6** Department of General Surgery, Renji Hospital, Shanghai Jiaotong University, Shanghai, China

✉ These authors contributed equally to this work.

\* [lianhao-hu@hotmail.com](mailto:lianhao-hu@hotmail.com) (LHH); [zhaoshen-li@hotmail.com](mailto:zhaoshen-li@hotmail.com) (ZSL); [78249073@qq.com](mailto:78249073@qq.com) (ZLX)

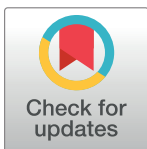

**OPEN ACCESS**

**Citation:** Hao L, Wang L-S, Liu Y, Wang T, Guo H-L, Pan J, et al. (2018) The different course of alcoholic and idiopathic chronic pancreatitis: A long-term study of 2,037 patients. PLoS ONE 13 (6): e0198365. <https://doi.org/10.1371/journal.pone.0198365>

**Editor:** Francisco X. Real, Centro Nacional de Investigaciones Oncologicas, SPAIN

**Received:** January 22, 2018

**Accepted:** May 17, 2018

**Published:** June 8, 2018

**Copyright:** © 2018 Hao et al. This is an open access article distributed under the terms of the [Creative Commons Attribution License](https://creativecommons.org/licenses/by/4.0/), which permits unrestricted use, distribution, and reproduction in any medium, provided the original author and source are credited.

**Data Availability Statement:** We are sorry that the data cannot be publicly deposited or included as supporting information due to ethical restrictions. The data contain patient information including name, address, and telephone number. The present study was approved by the Ethics Committee of Changhai Hospital, The Second Military Medical University, Shanghai, China. If someone wants more details about the data, please contact: [changhai.ec@gmail.com](mailto:changhai.ec@gmail.com).

## Abstract

### Background

Chronic pancreatitis (CP) is a chronic inflammatory disease of the pancreas. This study aimed to compare the natural course of alcoholic chronic pancreatitis (ACP) and idiopathic chronic pancreatitis (ICP).

### Methods

CP patients admitted to our center from January 2000 to December 2013 were enrolled. Characteristics were compared between ACP and ICP patients. Cumulative rates of diabetes mellitus (DM), steatorrhea, pancreatic stone, pancreatic pseudocyst, biliary stricture, and pancreatic cancer after the onset and the diagnosis of CP were calculated, respectively. The cumulative rates of DM and steatorrhea after diagnosis of pancreatic stone were also calculated.

### Results

A total of 2,037 patients were enrolled. Among them, 19.8% (404/2,037) were ACP and 80.2% (1,633/2,037) were ICP patients. ACP and ICP differs in many aspects, especially in gender, age, smoking, complications, morphology of pancreatic duct, and type of pain. The development of DM, steatorrhea, PPC, pancreatic stone, and biliary stricture were significantly earlier and more common in ACP patients. No significant difference was observed for pancreatic cancer development. There was a rather close correlation between exocrine/endocrine insufficiency and pancreatic stone in ACP patients, which was much less correlated in ICP patients.

**Funding:** This study was supported by the National Natural Science Foundation of China [Grant Nos. 81500490 (BRL), 81770635 (LHH), 81470883 (LHH), 81770632 (LX) and 81600439 (ZJC)], Shanghai Rising-Star Program [Grant No. 17QA1405500 (LHH)], Shanghai Outstanding Youth Doctor Training Program [Grant No. AB83030002015034 (LHH)], Shanghai Youth Top-notch Talent Program [Grant No. HZW2016FZ67 (LHH)], and Three engineering training funds in Shenzhen [Grant No. SYJY201713 (LSW)]. The funders had no role in study design, data collection and analysis, decision to publish, or preparation of the manuscript.

**Competing interests:** The authors have declared that no competing interests exist.

**Abbreviations:** ACP, alcoholic chronic pancreatitis; AIP, autoimmune pancreatitis; CI, confidence interval; CP, chronic pancreatitis; CT, computed tomography; DM, diabetes mellitus; ERCP, endoscopic retrograde cholangiopancreatography; ESWL, extracorporeal shockwave lithotripsy; GP, groove pancreatitis; ICP, idiopathic chronic pancreatitis; MPD, main pancreatic duct; MRI, magnetic resonance imaging; PPC, pancreatic pseudocyst; SD, standard deviation.

## Conclusion

The long-term profile of ACP and ICP differs in some important aspects. ACP patients usually have a more severe course of CP. These differences should be recognized in the diagnosis and treatment of CP.

## Introduction

Chronic pancreatitis (CP) is a chronic inflammatory disease of the pancreas, which leads to a progressive and irreversible destruction of pancreatic parenchyme and ductal structures [1, 2]. Alcoholic chronic pancreatitis (ACP) patients were those abused alcohol; while idiopathic chronic pancreatitis (ICP) patients were those had no recognized causes of CP.

Since 1963 several classifications of CP have been introduced [3–7]. These classifications were mainly concerned with the distinction between acute pancreatitis and CP. Moreover, they focused primarily on ACP and only marginally considered the nonalcoholic types. Ammann et al. were among the first to analyze the longitudinal course of CP based on 287 CP patients in 1980's. They correlated it with cause, and found that excessive alcohol use was associated with a more severe course [8,9]. ACP is characterized by recurrent episodes of acute pancreatitis in early stages and by progressive pancreatic dysfunction. In its later stages, pain relief occurs spontaneously in some of them [8]. Moreover, they first described nonalcoholic, idiopathic CP characterized first by onset of symptoms late in life, and second by a different clinical course compared with ACP [9,10].

The above studies focused on the natural course of ACP and ICP patients helped us better understand CP. However, these studies were carried out decades ago, with relative small sample size. With the change of lifestyle habits in recent years, the proportion of ACP and ICP have changed [11–14], and the differences between course of ACP and ICP are still unclear. There's still lack of studies based on large sample size of CP patients and longtime of follow-up, especially in recent years. Thus, study should be performed to explore the difference of natural course of ACP and ICP in a larger scale and longer follow-up time.

The study aimed to evaluate epidemiological features, initial manifestations, natural course and complications, and compare them between alcoholic and idiopathic CP. This may help us to choose the suitable treatment strategy according to the etiologies of CP.

## Materials and methods

### Patients and database

Since the 1990s, an electronic medical record system (GOODWILL Inc., Beijing, China) has been used in Changhai Hospital, which has facilitated several studies on CP [2,12,15–20]. In order to track changes consistently throughout the course of CP and facilitate the evaluation and study of CP, a dedicated database, the CP Database (version number 2.1, YINMA Information Technology Inc., Shanghai, China) was established in 2005 to collect clinical data of CP patients who were admitted to our center. Data from January 2000 to December 2004 were retrospectively collected according to the electronic medical record system and complemented through telephone, letter, and e-mail inquiries. Data were prospectively collected since January 2005. The following information was documented in detail: demographic data (age, sex, birthplace, et al), course of CP, medical history, history of other diseases, tobacco and alcohol

consumption, family history of pancreatic diseases and diabetes mellitus (DM), laboratory and imaging findings, and treatment strategy.

The database system was set to remind the investigators to call patients for clinical check-ups. Aside from visits due to complaints of discomfort related to CP, all patients were periodically (annually at least) recalled for clinical checkup and investigations. Ultrasound, magnetic resonance imaging (MRI), or computed tomography (CT) was selected as an evaluation modality during each follow-up visit. An evaluation of each revisit or evaluation via telephone inquiries for patients who did not return to our center was added to the CP database. In December 2013, we contacted all the patients in our database for a final evaluation, except those who were lost to follow-up or died. The duration of follow-up is defined as the duration from the onset of CP to the date of the last personal contact, death, or end of follow-up (December 2013), whichever came first.

Exclusion criteria were as follows (Fig 1): pancreatic cancer diagnosed within 2 years after the diagnosis of CP [21], groove pancreatitis (GP) [22], and autoimmune pancreatitis (AIP). In the present study, patients with other etiologies (including abnormal anatomy of pancreatic duct, hereditary, post-traumatic, and hyperlipidemic) were excluded. In the part of study for patients with intraductal pancreatic stones, the patients without pancreatic stone were further excluded.

The study was approved by the Ethics Committee of Changhai Hospital, The Second Military Medical University, Shanghai, China. Written informed consent was obtained from all participating patients. All of the diagnostic and therapeutic modalities were carried out in accordance with the approved guidelines [26,27].

## Definitions

The diagnosis of CP was established when either of the following conditions was met: (1) the presence of pancreatic calcification, (2) pancreatic ductal changes (moderate or marked disease according to Cambridge classification system), (3) abnormal results of pancreatic function tests, (4) endoscopic ultrasound abnormalities indicating CP or (5) histological proof of CP, as described by the Asia-Pacific consensus [28]. Onset of CP was considered when the first manifestation related to CP occurred. Such as recurrent pancreatic pain, chronic pancreatic pain, acute pancreatitis attack, DM, steatorrhea, or asymptomatic patients diagnosed of CP in the course of physical examinations. ACP was considered when alcohol intake exceeded 80 g/day for males or 60 g/day for females for at least 2 years in the absence of other causes [29]. Patients with CP were considered idiopathic when none of the above causes were found.

## Treatment strategy

In our center, endoscopic treatment was taken as principle methods: extracorporeal shockwave lithotripsy (ESWL)/ endoscopic retrograde cholangiopancreatography (ERCP) for stone removal and main pancreatic duct (MPD) drainage [19,30,31]. Surgical treatment (eg, pancreaticoduodenectomy, distal pancreatectomy) was taken when endoscopic treatment is of poor effectiveness or in CP patients with mass. For CP patients who did not experience pain, interventions were performed only when complications such as biliary stricture, infection, or pancreatic pseudocyst (PPC) enlargement had occurred [27], whereas DM and/or steatorrhea were not indications for invasive treatment of CP.

## Statistical analysis

In the comparison of ACP and ICP patients, continuous variables are expressed as mean  $\pm$  standard deviation (SD) and compared using an unpaired, 2-tailed *t* test or Mann-

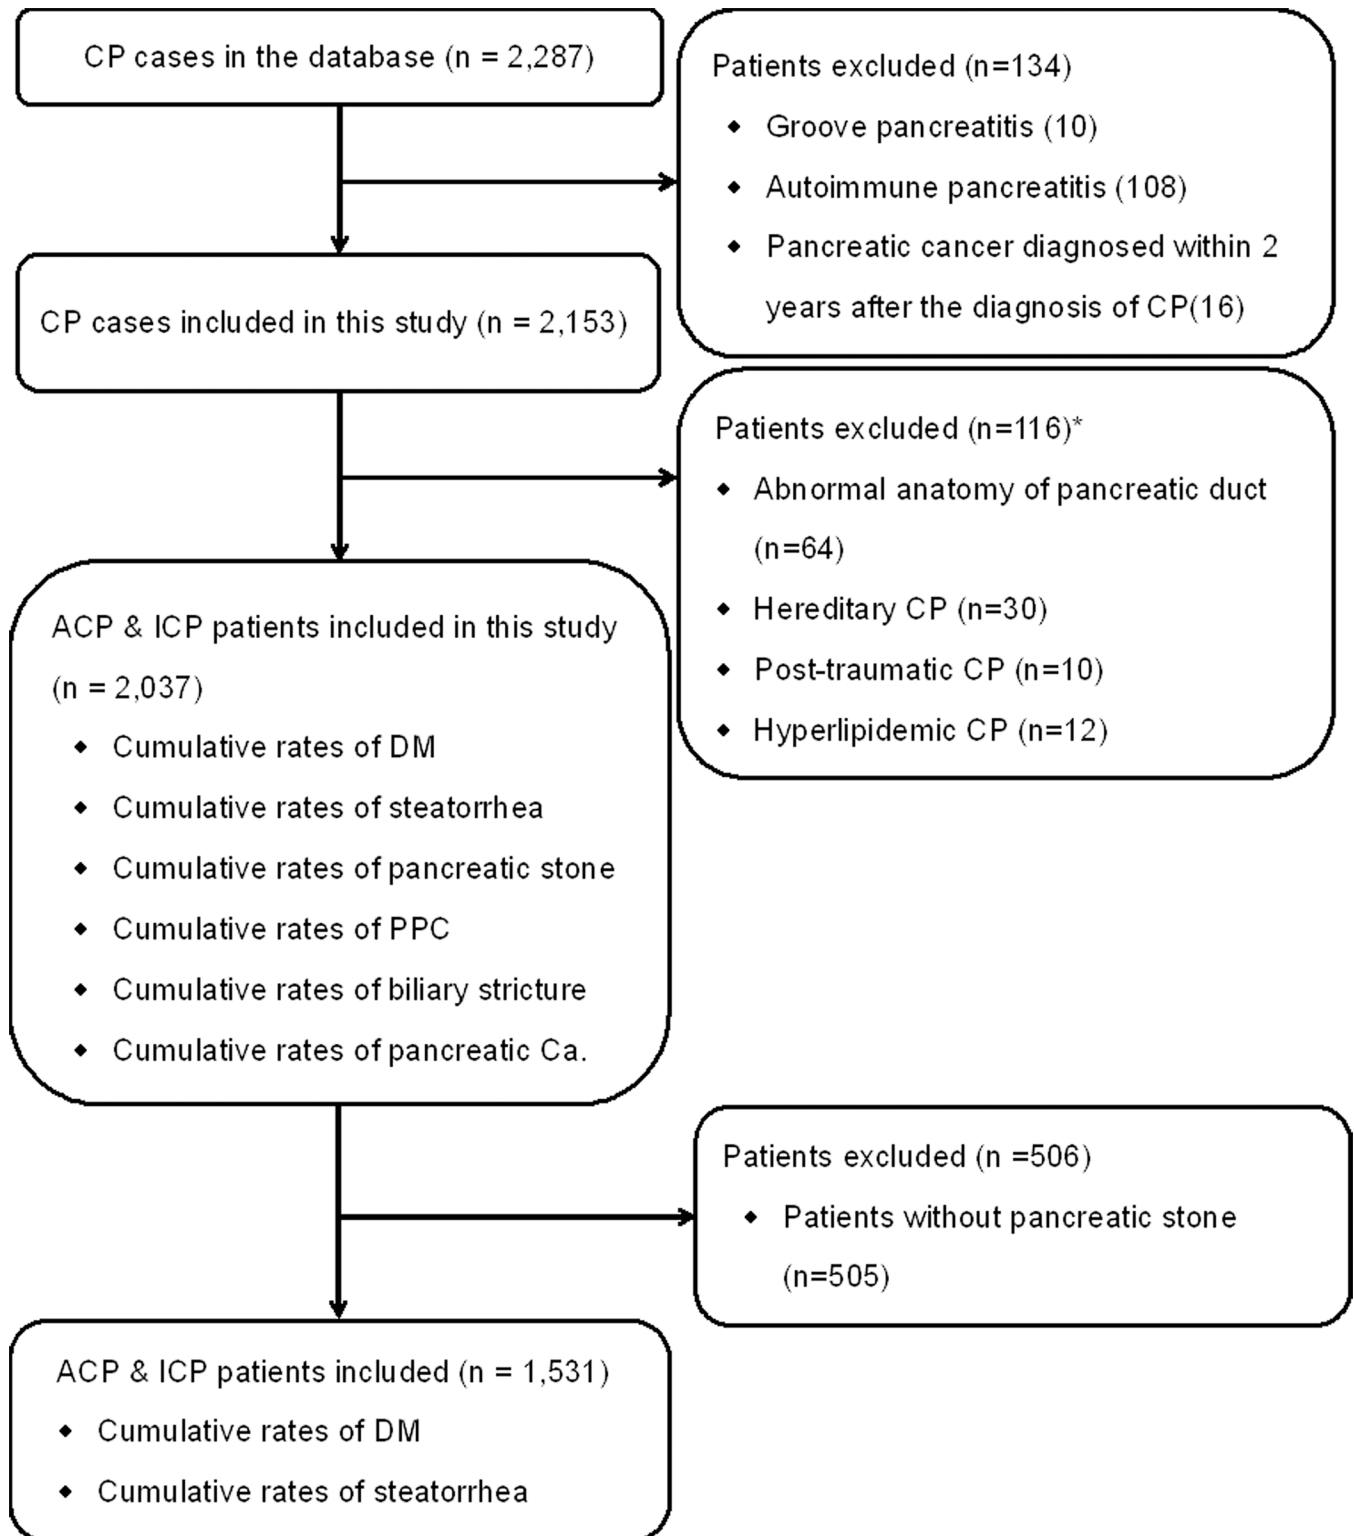

**Fig 1. Flow diagram of patients enrollment and study design.** \*Abnormal anatomy of pancreatic duct includes pancreas divisum and anomalous pancreato-biliary junction [23]. Hereditary CP refers to 2 first-degree relatives or  $\geq 3$  second-degree relatives, in  $\geq 2$  generations with recurrent acute pancreatitis and/or CP, for which there were no precipitating factors [24]. Patients were defined as having post-traumatic CP when there was a history of abdominal trauma with imaging evidence of pancreatic injury and subsequent ductal dilation. Hyperlipidemia is considered as an etiology when blood triglyceride is  $>1000$  mg/dL [25] ACP = alcoholic chronic pancreatitis, ICP = idiopathic chronic pancreatitis, CP = chronic pancreatitis.

<https://doi.org/10.1371/journal.pone.0198365.g001>

Whitney test. Categorical variables were compared using the  $\chi^2$  test or Fisher exact test. Cumulative rates of DM, steatorrhea, pancreatic stone, PPC, biliary stricture, and pancreatic cancer after the onset and diagnosis of CP were calculated by using the Kaplan-Meier method [32]. The cumulative rates of DM and steatorrhea after diagnosis of pancreatic stone were also calculated by using the Kaplan-Meier method.

## Results

### General characteristics of study subjects

As shown in Fig 1, from January 2000 to December 2013, a total of 2,287 CP patients were entered in the CP database. After exclusion of 134 patients, which consisted of 16 patients diagnosed with pancreatic cancer within 2 years after the diagnosis of CP, 10 patients diagnosed with GP, and 108 patients diagnosed with AIP, a cohort of 2,153 patients with CP was established. After further exclusion of 64 patients with abnormal anatomy of pancreatic duct, 30 patients with hereditary CP, 10 patients with post-traumatic CP, and 12 patients with hyperlipidemic CP, a cohort of 2,037 patients with CP was finally enrolled.

The general characteristics of these patients are listed in Table 1. The median duration of follow-up was 7.6 (range, 0.0–53.2) years. In the 404 patients of ACP, the median duration of follow-up was 8.3 (range, 0.0–43.2) years, while in the 1,633 patients of ICP, the median duration of follow-up was 7.3 (range, 0.0–53.2) years. Gender, age at the onset and diagnosis of CP, smoking history, pancreatic stones, DM, steatorrhea, PPC, morphology of MPD, and type of pain were significantly different between ACP and ICP patients (all  $P < 0.001$ ). Initial manifestations, overall treatment, and DM in first-/second-/third-degree relatives were also different between the two groups (all  $P < 0.05$ ).

### Cumulative rates in ACP and ICP

**Cumulative rates of DM.** DM developed in 28.8% (587/2,037) eligible patients in the present study. The rates were 38.9% (157/404) in ACP patients and 26.3% (430/1,633) in ICP patients. DM developed in 71, 84 and 120 patients at 3, 5 and 10 years in ACP group after the onset of CP, with the cumulative rates of 17.6% (95% confidence interval [CI]: 15.7%–19.4%), 20.8% (95% CI: 18.7%–22.9%) and 29.7% (95% CI: 27.0%–32.4%); while in 264, 294 and 355 patients in ICP group, with the cumulative rates of 16.2% (95% CI: 15.2%–17.1%), 18.0% (95% CI: 17.0%–19.0%) and 21.7% (95% CI: 20.5%–23.0%), respectively. Significant difference in the rates of DM after the onset of CP was observed between ACP and ICP patients ( $P < 0.001$ , Fig 2A).

DM developed in 42, 51 and 66 patients at 3, 5 and 10 years in ACP group after the onset of CP, with the cumulative rates of 13.4% (95% CI: 11.3%–15.6%), 15.9% (95% CI: 13.1%–19.0%) and 20.6% (95% CI: 14.6%–26.6%); while in 95, 113 and 152 patients in ICP group, with the cumulative rates of 6.9% (95% CI: 6.1%–7.8%), 8.3% (95% CI: 7.3%–9.2%) and 11.1% (95% CI: 9.4%–12.9%), respectively. Significant difference in the rates of DM after the diagnosis of CP was observed between ACP and ICP patients ( $P < 0.001$ , Fig 3A).

**Cumulative rates of steatorrhea.** Steatorrhea developed in 22.5% (459/2,037) eligible patients in the present study. The rates were 29.7% (120/404) in ACP patients and 20.8% (339/1,633) in ICP patients. Steatorrhea developed in 51, 64 and 90 patients at 3, 5 and 10 years in ACP group after the onset of CP, with the cumulative rates of 12.9% (95% CI: 11.2%–14.6%), 16.2% (95% CI: 14.2%–18.2%) and 22.8% (95% CI: 20.2%–25.3%); while in 185, 205 and 251 patients in ICP group, with the cumulative rates of 11.4% (95% CI: 10.6%–12.2%), 12.6% (95% CI: 11.7%–13.5%) and 15.4% (95% CI: 14.3%–16.6%), respectively. Significant difference in the

**Table 1. General characteristics of 2,037 patients with CP.**

| Items                                        | Overall<br>N = 2037 | ACP<br>N = 404 | ICP<br>N = 1633 | P      |
|----------------------------------------------|---------------------|----------------|-----------------|--------|
| Male sex                                     | 1428 (70.1%)        | 398 (98.3%)    | 1031 (63.1%)    | <0.001 |
| Age at the onset of CP, y*                   | 38.765±16.468       | 38.056±17.460  | 41.631±11.195   | <0.001 |
| Age at the diagnosis of CP, y*               | 43.499±15.436       | 42.629±16.432  | 47.015±9.740    | <0.001 |
| Adolescent**                                 | 250 (12.3%)         | 2 (0.5%)       | 248 (15.2%)     | <0.001 |
| Smoking history                              | 698 (34.3%)         | 326 (80.7%)    | 372 (22.8%)     | <0.001 |
| Body mass index*                             | 20.915±3.432        | 20.970±3.022   | 20.900±3.539    | 0.729  |
| Initial manifestations                       |                     |                |                 | 0.041  |
| Abdominal pain                               | 1700 (83.5%)        | 354 (87.6%)    | 1346 (82.4%)    |        |
| Endocrine/Exocrine dysfunction               | 210 (10.3%)         | 32 (7.9%)      | 178 (10.9%)     |        |
| Others                                       | 127 (6.2%)          | 18 (4.5%)      | 109 (6.7%)      |        |
| Pancreatic stones#                           | 1531 (75.2%)        | 339 (83.9%)    | 1192 (73.0%)    | <0.001 |
| Age at pancreatic stone diagnosis*           | 41.813±15.296       | 47.324±9.458   | 40.246±16.250   | <0.001 |
| Time between onset and pancreatic stone*     | 5.706±7.196         | 6.069±6.573    | 5.602±7.363     | 0.292  |
| DM                                           | 587 (28.8%)         | 157 (38.9%)    | 430 (26.3%)     | <0.001 |
| Age at diabetes*                             | 46.356±11.470       | 45.813±9.093   | 46.554±12.226   | 0.428  |
| Time between onset and DM*                   | 5.036±7.268         | 5.685±6.259    | 4.799±7.596     | 0.191  |
| Steatorrhea                                  | 459 (22.5%)         | 120 (29.7%)    | 339 (20.8%)     | <0.001 |
| Age at steatorrhea*                          | 42.762±12.653       | 45.867±8.925   | 41.774±13.489   | <0.001 |
| Time between onset and steatorrhea*          | 5.005±8.308         | 5.502±5.839    | 4.847±8.953     | 0.370  |
| Biliary stricture                            | 331 (16.2%)         | 72 (17.8%)     | 259 (15.9%)     | 0.339  |
| Age at CBD stenosis*                         | 51.543±12.918       | 52.118±13.662  | 49.476±9.587    | 0.063  |
| Time between onset and CBD stenosis*         | 5.635±8.712         | 5.419±8.913    | 6.412±7.956     | 0.393  |
| Pancreatic pseudocyst                        | 334 (16.4%)         | 94 (23.3%)     | 240 (14.7%)     | <0.001 |
| Age at pseudocyst*                           | 46.188±15.070       | 47.745±9.859   | 45.570±16.671   | 0.158  |
| Time between onset and pseudocyst formation* | 4.936±6.976         | 6.666±5.766    | 4.250±7.299     | 0.002  |
| Pancreatic Cancer                            | 21 (1.0%)           | 3 (0.7%)       | 18 (1.1%)       | 0.522  |
| Death                                        | 70 (3.4%)           | 13 (3.2%)      | 57 (3.5%)       | 0.788  |
| Morphology of MPD                            |                     |                |                 | <0.001 |
| Pancreatic stone alone                       | 563 (27.6%)         | 108 (26.7%)    | 455 (27.9%)     |        |
| MPD stenosis alone                           | 570 (28.0%)         | 73 (18.1%)     | 497 (30.4%)     |        |
| MPD stenosis and stone                       | 678 (33.3%)         | 159 (39.4%)    | 519 (31.8%)     |        |
| Complex pathologic changes                   | 226 (11.1%)         | 64 (15.8%)     | 162 (9.9%)      |        |
| Type of pain                                 |                     |                |                 | <0.001 |
| Recurrent acute pancreatitis                 | 635 (31.2%)         | 148 (36.6%)    | 487 (29.8%)     |        |
| Recurrent pain                               | 603 (29.6%)         | 89 (22.0%)     | 514 (31.5%)     |        |
| Recurrent acute pancreatitis and pain        | 545 (26.8%)         | 126 (31.2%)    | 419 (25.7%)     |        |
| Chronic pain                                 | 98 (4.8%)           | 19 (4.7%)      | 79 (4.8%)       |        |
| Without pain                                 | 156 (7.7%)          | 22 (5.4%)      | 134 (8.2%)      |        |
| Severe acute pancreatitis                    | 65 (3.2%)           | 10 (2.5%)      | 55 (3.4%)       | 0.361  |
| Successful drainage+                         | 1403 (68.9%)        | 284 (70.3%)    | 1119 (68.5%)    | 0.491  |
| Overall treatment                            |                     |                |                 | 0.035  |
| Endotherapy alone                            | 1403 (68.9%)        | 298 (73.8%)    | 1105 (67.7%)    |        |
| Surgery alone                                | 241 (11.8%)         | 39 (9.7%)      | 202 (12.4%)     |        |
| Both endotherapy and surgery                 | 172 (8.4%)          | 36 (8.9%)      | 136 (8.3%)      |        |
| Conservative treatment                       | 221 (10.8%)         | 31 (7.7%)      | 190 (11.6%)     |        |
| DM in first-/second-/third-degree relatives  | 116 (5.7%)          | 35 (8.7%)      | 81 (5.0%)       | 0.004  |

(Continued)



Table 1. (Continued)

| Items                                                                                  | Overall<br>N = 2037 | ACP<br>N = 404 | ICP<br>N = 1633 | P     |
|----------------------------------------------------------------------------------------|---------------------|----------------|-----------------|-------|
| Pancreatic diseases in first-/second-/third-degree relatives (excluding hereditary CP) | 31 (1.5%)           | 8 (2.0%)       | 23 (1.4%)       | 0.401 |

CP = chronic pancreatitis, DM = diabetes mellitus, ICP = idiopathic chronic pancreatitis, ACP = alcoholic chronic pancreatitis, HCP = hereditary chronic pancreatitis

\*Mean ± SD.

#Pancreatic calcifications were also regarded as stones that are located in branch pancreatic duct or ductulus.

+Patients with successful main pancreatic duct (MPD) drainage are those whose CP was established after ERCP or pancreatic surgery or those who underwent successful MPD drainage during administration when CP diagnosis was established.

\*\*Adolescents were patients with CP onset before 18 years old.

<https://doi.org/10.1371/journal.pone.0198365.t001>

rates of steatorrhea after the onset of CP was observed between ACP and ICP patients ( $P = 0.007$ , Fig 2B).

Steatorrhea developed in 28, 36 and 51 patients at 3, 5 and 10 years in ACP group after the onset of CP, with the cumulative rates of 8.3% (95% CI: 6.6%-10.1%), 10.7% (95% CI: 8.1%-13.4%) and 15.2% (95% CI: 10.0%-20.4%); while in 90, 112 and 130 patients in ICP group, with the cumulative rates of 6.3% (95% CI: 5.5%-7.1%), 7.8% (95% CI: 6.8%-8.9%) and 9.1%

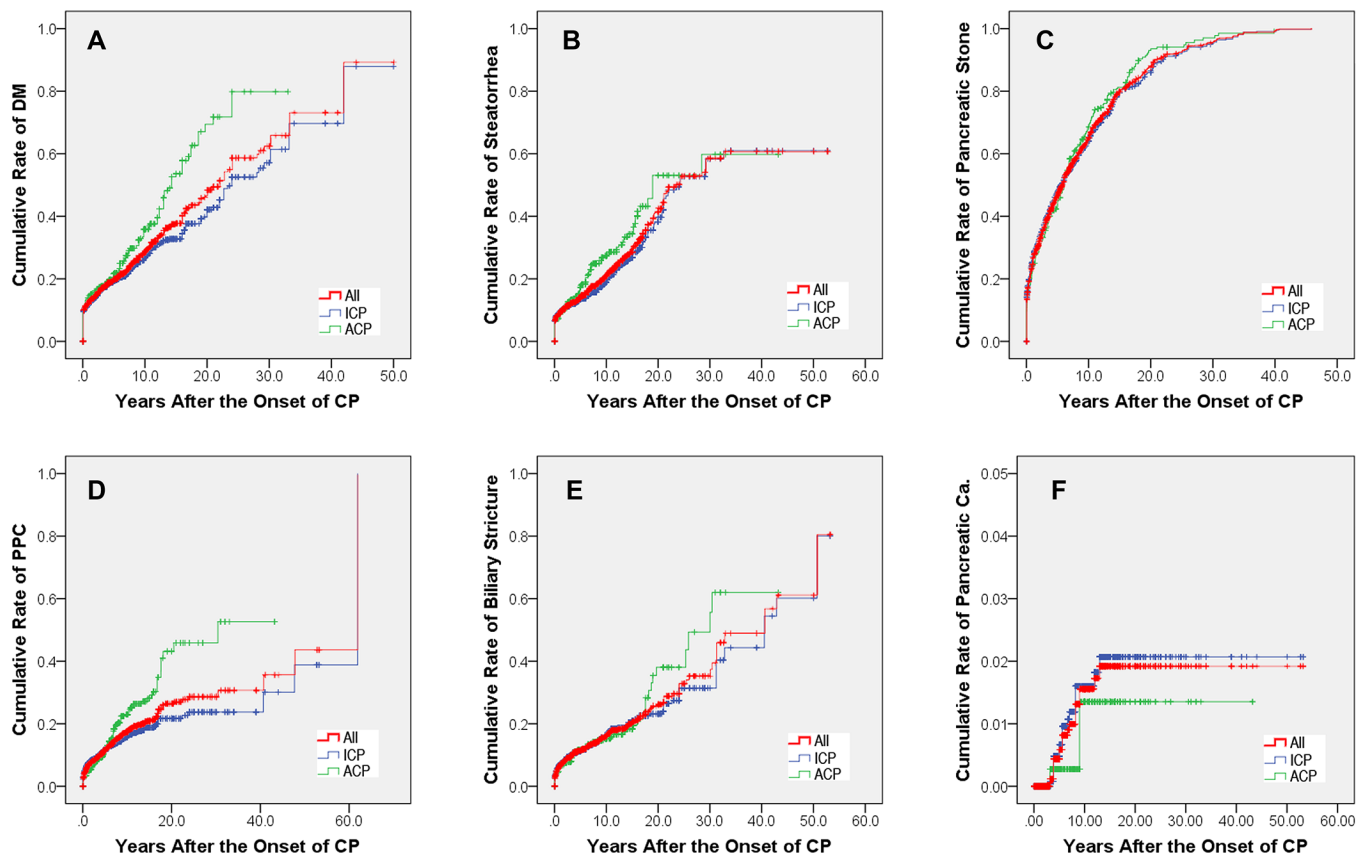

**Fig 2. The cumulative rates after the onset of CP.** (A) The cumulative rates of diabetes mellitus; (B) The cumulative rates of steatorrhea; (C) The cumulative rates of pancreatic stone; (D) The cumulative rates of pancreatic pseudocysts; (E) The cumulative rates of biliary stricture; (F) The cumulative rates of pancreatic cancer. ACP = alcoholic chronic pancreatitis, Ca. = cancer, CP = chronic pancreatitis, DM = diabetes mellitus, ICP = idiopathic chronic pancreatitis, PPC = pancreatic pseudocyst.

<https://doi.org/10.1371/journal.pone.0198365.g002>

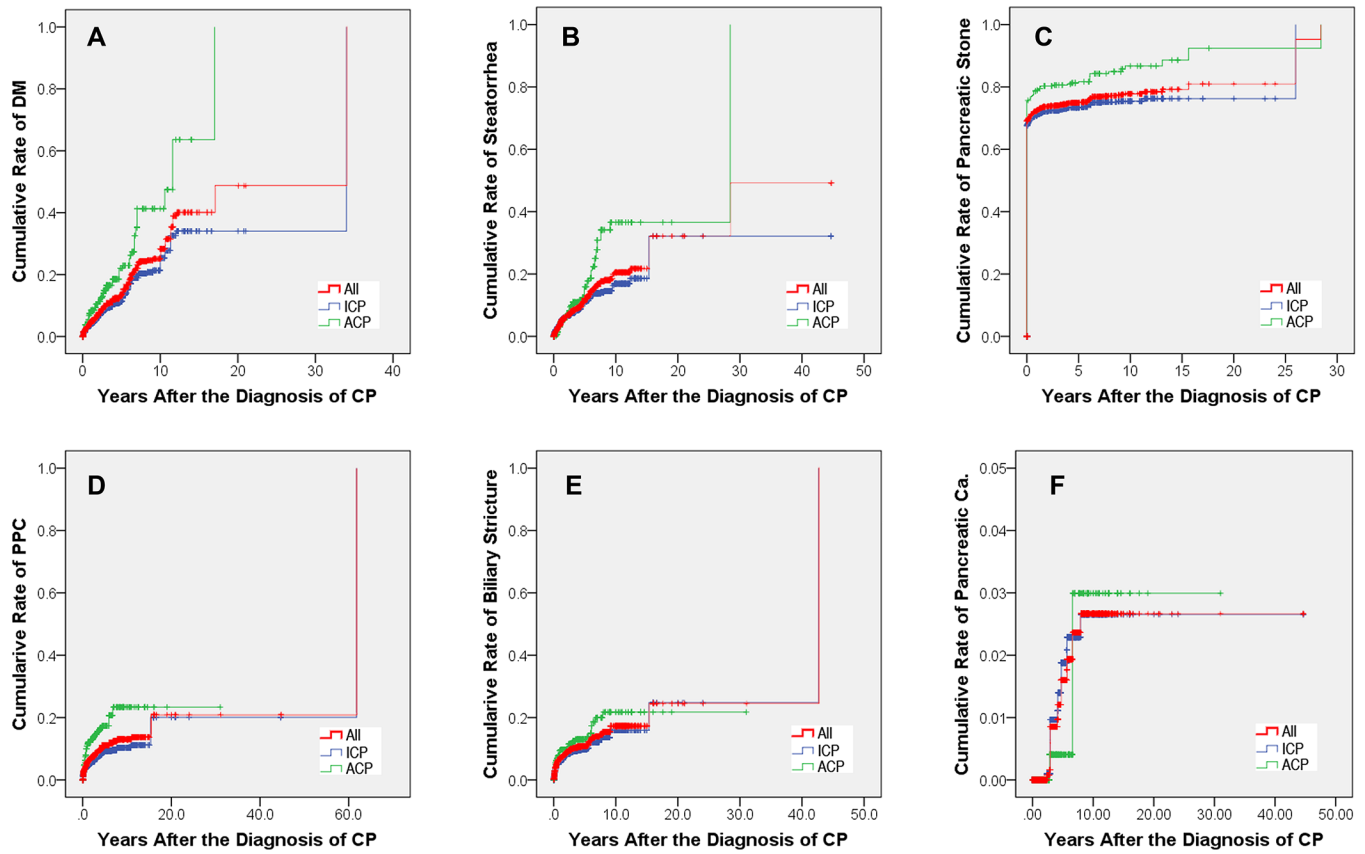

**Fig 3. The cumulative rates after the diagnosis of CP.** (A) The cumulative rates of diabetes mellitus; (B) The cumulative rates of steatorrhea; (C) The cumulative rates of pancreatic stone; (D) The cumulative rates of pancreatic pseudocysts; (E) The cumulative rates of biliary stricture; (F) The cumulative rates of pancreatic cancer. ACP = alcoholic chronic pancreatitis, Ca. = cancer, CP = chronic pancreatitis, DM = diabetes mellitus, ICP = idiopathic chronic pancreatitis, PPC = pancreatic pseudocyst.

<https://doi.org/10.1371/journal.pone.0198365.g003>

(95% CI: 7.3%-10.9%), respectively. Significant difference in the rates of steatorrhea after the diagnosis of CP was observed between ACP and ICP patients ( $P = 0.002$ , Fig 3B).

**Cumulative rates of pancreatic stone.** Pancreatic stone developed in 75.2% (1,531/2,037) eligible patients in the present study. The rates were 83.9% (339/404) in ACP patients and 73.0% (1,192/1,633) in ICP patients. Pancreatic stone developed in 140, 172 and 266 patients at 3, 5 and 10 years in ACP group after the onset of CP, with the cumulative rates of 34.7% (95% CI: 32.3%-37.0%), 42.6% (95% CI: 40.1%-45.0%) and 65.8% (95% CI: 63.5%-68.2%); while in 606, 744 and 945 patients in ICP group, with the cumulative rates of 37.1% (95% CI: 35.9%-38.3%), 45.6% (95% CI: 44.3%-46.8%) and 57.9% (95% CI: 56.6%-59.1%), respectively. No significant difference in the rates of pancreatic stone after the onset of CP was observed between ACP and ICP patients ( $P = 0.194$ , Fig 2C).

Pancreatic stone developed in 324, 326 and 336 patients at 3, 5 and 10 years in ACP group after the onset of CP, with the cumulative rates of 95.6% (95% CI: 93.6%-97.5%), 96.2% (95% CI: 94.2%-98.1%) and 99.1% (95% CI: 97.1%-99.6%); while in 1,166, 1,174 and 1,187 patients in ICP group, with the cumulative rates of 97.8% (95% CI: 96.7%-98.9%), 98.5% (95% CI: 97.4%-99.6%) and 99.6% (95% CI: 98.4%-99.6%), respectively. Significant difference in the rates of pancreatic stone after the diagnosis of CP was observed between ACP and ICP patients ( $P < 0.001$ , Fig 3C).



**Cumulative rates of PPC.** PPC developed in 16.4% (334/2,037) eligible patients in the present study. The rates were 23.3% (94/404) in ACP patients and 14.7% (240/1,633) in ICP patients. PPC developed in 32, 43 and 74 patients at 3, 5 and 10 years in ACP group after the onset of CP, with the cumulative rates of 7.9% (95% CI: 6.6%-9.3%), 10.7% (95% CI: 9.0%-12.3%) and 18.4% (95% CI: 16.0%-20.7%); while in 145, 175 and 211 patients in ICP group, with the cumulative rates of 8.9% (95% CI: 8.2%-9.6%), 10.7% (95% CI: 10.0%-11.5%) and 12.9% (95% CI: 11.9%-14.0%), respectively. Significant difference in the rates of PPC after the onset of CP was observed between ACP and ICP patients ( $P = 0.001$ , Fig 2D).

PPC developed in 50, 55 and 61 patients at 3, 5 and 10 years in ACP group after the onset of CP, with the cumulative rates of 13.5% (95% CI: 11.6%-15.3%), 14.8% (95% CI: 12.7%-17.0%) and 16.4% (95% CI: 13.3%-19.6%); while in 87, 104 and 107 patients in ICP group, with the cumulative rates of 5.8% (95% CI: 5.1%-6.5%), 6.9% (95% CI: 6.0%-7.8%) and 7.1% (95% CI: 6.1%-8.2%), respectively. Significant difference in the rates of PPC after the diagnosis of CP was observed between ACP and ICP patients ( $P < 0.001$ , Fig 3D).

**Cumulative rates of biliary stricture.** Biliary stricture developed in 16.2% (331/2,037) eligible patients in the present study. The rates were 17.8% (72/404) in ACP patients and 15.9% (259/1,633) in ICP patients. Biliary stricture developed in 31, 45 and 90 patients at 3, 5 and 10 years in ACP group after the onset of CP, with the cumulative rates of 7.7% (95% CI: 6.4%-8.9%), 11.1% (95% CI: 9.6%-12.7%) and 13.4% (95% CI: 11.4%-15.3%); while in 150, 172 and 214 patients in ICP group, with the cumulative rates of 9.2% (95% CI: 8.5%-9.9%), 10.5% (95% CI: 9.7%-11.1%) and 13.1% (95% CI: 14.2%-12.0%), respectively. No significant difference in the rates of biliary stricture after the onset of CP was observed between ACP and ICP patients ( $P = 0.609$ , Fig 2E).

Biliary stricture developed in 42, 44 and 51 patients at 3, 5 and 10 years in ACP group after the onset of CP, with the cumulative rates of 11.1% (95% CI: 6.6%-10.1%), 11.5% (95% CI: 9.6%-13.4%) and 13.3% (95% CI: 9.9%-16.8%); while in 117, 122 and 141 patients in ICP group, with the cumulative rates of 7.7% (95% CI: 6.9%-8.5%), 8.1% (95% CI: 7.2%-8.9%) and 9.3% (95% CI: 7.6%-11.0%), respectively. Significant difference in the rates of biliary stricture after the diagnosis of CP was observed between ACP and ICP patients ( $P = 0.040$ , Fig 3E).

**Cumulative rates of pancreatic cancer.** Pancreatic cancer developed in 1.0% (21/2,037) eligible patients in the present study. The rates were 0.7% (3/404) in ACP patients and 1.1% (18/1,633) in ICP patients. Pancreatic cancer developed in 0, 1 and 3 patients at 3, 5 and 10 years in ACP group after the onset of CP, with the cumulative rates of 0.0%, 0.2% (95% CI: 0.0%-0.5%) and 0.7% (95% CI: 0.0%-1.5%); while in 0, 6 and 16 patients in ICP group, with the cumulative rates of 0.0%, 0.4% (95% CI: 0.2%-0.6%) and 1.0% (95% CI: 0.6%-1.4%), respectively. No significant difference in the rates of pancreatic cancer after the onset of CP was observed between ACP and ICP patients ( $P = 0.404$ , Fig 2F).

Pancreatic cancer developed in 1, 1 and 3 patients at 3, 5 and 10 years in ACP group after the onset of CP, with the cumulative rates of 0.2% (95% CI: 0.0%-0.6%), 0.2% (95% CI: 0.0%-0.6%) and 0.7% (95% CI: 0.0%-2.5%); while in 9, 15 and 18 patients in ICP group, with the cumulative rates of 0.6% (95% CI: 0.3%-0.8%), 0.9% (95% CI: 0.4%-1.4%) and 1.1% (95% CI: 0.4%-1.8%), respectively. No significant difference in the rates of pancreatic cancer after the diagnosis of CP was observed between ACP and ICP patients ( $P = 0.569$ , Fig 3F).

## Endocrine and exocrine impairment in patients with pancreatic stones

After further exclusion of 506 patients without pancreatic stones, a cohort of 1,531 patients was included in the present study, which contains 339 of ACP patients and 1,192 of ICP patients.

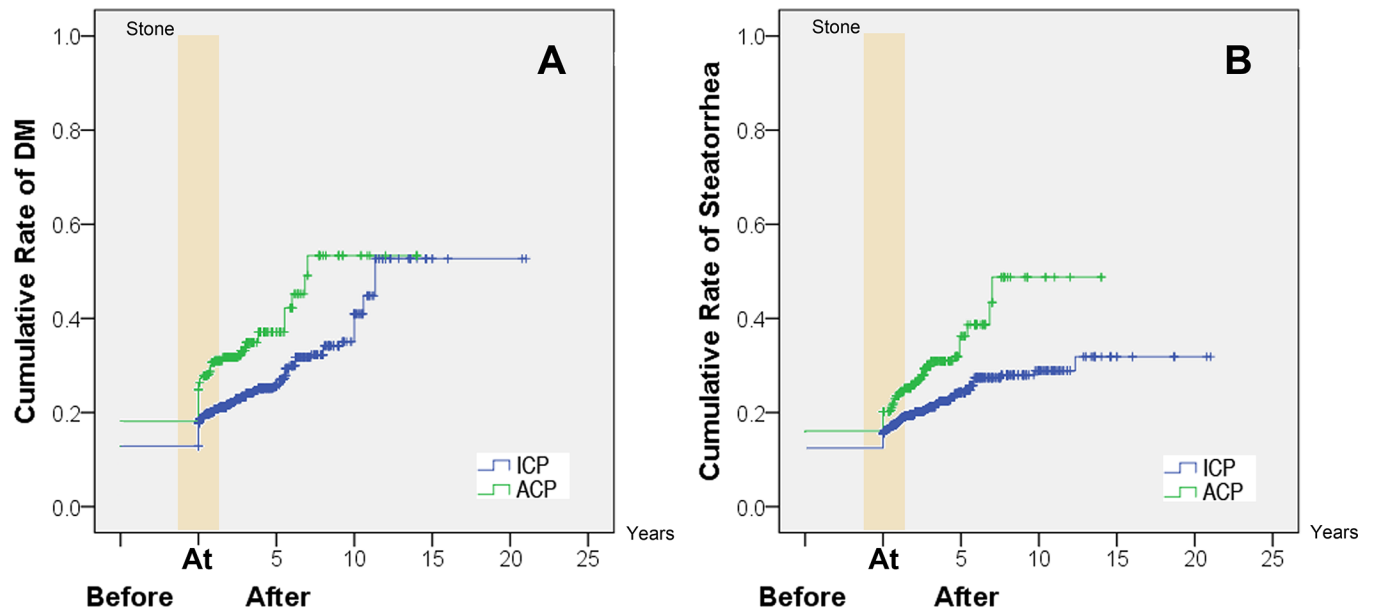

**Fig 4. The cumulative rates after the diagnosis of pancreatic stone.** (A) The cumulative rates of diabetes mellitus; (B) The cumulative rates of steatorrhea. ACP = alcoholic chronic pancreatitis, DM = diabetes mellitus, ICP = idiopathic chronic pancreatitis.

<https://doi.org/10.1371/journal.pone.0198365.g004>

**Endocrine impairment in patients with pancreatic stones.** DM developed in 37.2% (126/339) patients in ACP group and 26.2% (312/1,192) in ICP patients. DM developed in 62, 116 and 126 patients before pancreatic stone diagnosis, 5 and 10 years after pancreatic stone diagnosis in ACP group, with the cumulative rates of 18.3% (95%CI: 16.2%-20.3%), 34.2% (95% CI: 31.4%-37.1%) and 37.2% (95% CI: 32.1%-42.3%); while in 155, 273 and 298 patients in ICP group, with the cumulative rates of 13.0% (95%CI: 12.0%-14.0%), 22.9% (95% CI: 21.5%-24.3%) and 25.0% (95% CI: 22.6%-27.4%), respectively. Significant difference in the rates of DM development in patients with pancreatic stones was observed between ACP and ICP patients ( $P < 0.001$ , Fig 4A).

**Exocrine impairment in patients with pancreatic stones.** Steatorrhea developed in 31.6% (107/339) patients in ACP group and 21.6% (258/1,192) in ICP patients. Steatorrhea developed in 54, 101 and 107 patients before pancreatic stone diagnosis, 5 and 10 years after pancreatic stone diagnosis in ACP group, with the cumulative rates of 15.9% (95%CI: 14.0%-17.9%), 27.8% (95% CI: 26.5%-33.1%) and 31.6% (95% CI: 26.0%-37.1%); while in 142, 245 and 257 patients in ICP group, with the cumulative rates of 11.9% (95%CI: 11.0%-12.8%), 20.6% (95% CI: 19.2%-21.9%) and 21.6% (95% CI: 19.5%-22.6%), respectively. Significant difference in the rates of steatorrhea development in patients with pancreatic stones was observed between ACP and ICP patients ( $P < 0.001$ , Fig 4B).

## Discussion

To our knowledge, this is a study about natural course of ACP and ICP based on the largest cohort of CP patients. In the present study, epidemiological features, initial manifestations, natural course and complications of CP were evaluated.

The etiologies of CP were significantly different in different countries or time period (Table 2). ACP was considered the most frequent etiology of CP in western countries, which account for about 49.1%-89.7% [13,33–35]. ACP was also the most frequent etiology of CP in Japan, accounting for 67.5% [36]. However, the etiology of CP in developing countries of Asia

**Table 2. Researches on etiologies of CP patients in different countries.**

| Countries              | Inclusion period | ACP          | ICP          | Other etiologies |
|------------------------|------------------|--------------|--------------|------------------|
| Danish [33]            | 1995–2010        | 6306 (52.7%) | -            | 5666 (47.3%)*    |
| Japan [36]             | 2011             | 1171 (67.5%) | 347 (20.0%)  | 216 (12.5)       |
| China [11]             | 1994–2004        | 705 (35.1%)  | 259 (12.9%)  | 1044 (52.0%)     |
| The United States [34] | 2000–2014        | 575 (49.1%)  | 286 (24.4%)  | 310 (26.5%)      |
| India [39]             | -2007            | 400 (38.7%)  | 622 (60.2%)  | 11 (1.1%)        |
| Brazil [35]            | 1963–1986        | 282 (85.7%)  | 34 (10.3%)   | 13 (4.0%)        |
| Germany [13]           | 1989–1995        | 733 (72.0%)  | 224 (22.0%)  | 61 (6.0%)        |
| Present study          | 2000–2013        | 404 (18.8%)  | 1633 (75.8%) | 116 (5.4)        |

\*Nonalcoholic CP

ACP = alcoholic chronic pancreatitis, CP = chronic pancreatitis, ICP = idiopathic chronic pancreatitis

<https://doi.org/10.1371/journal.pone.0198365.t002>

is not the same. ICP was reported only 12.9% in 1994–2004 in China [11], but was reported the most frequent etiology of CP in recent studies in China and India, accounting for up to 57.3%–69.6% [11,20,37–41]. In the present study, ICP was defined in 75.8% patients.

The data of this study reveal a significantly difference between ACP and ICP patients. ACP is likely to occur in male patients with smoking history. Age at onset and diagnosis of ACP is significantly younger than ICP patients. It was reported that the younger the patients are when they begin their alcohol abuse, the shorter the time required for chronic pancreatitis to develop seems to be [42]; while ICP has two age peaks, one in young patients and the other in elderly patients [43]. ACP patients are more likely to have recurrent acute pancreatitis attack, while ICP patients have more recurrent pain or without pain [9,44,45]. It is generally assumed that alcohol dependent develop clinically acute pancreatitis in the context of preexistent (clinically latent) CP with distinct fibrosis and protein plugs in the small ducts [46], which seriously affect the life quality of these patients.

The development of DM, steatorrhea, and PPC after the onset and diagnosis of CP were significantly different between ACP and ICP patients. The development of pancreatic stone and biliary stricture were also different after the diagnosis of CP. The insufficiencies of pancreatic endocrine and exocrine were more common, as well as occurred earlier, in ACP patients, which reveals the progressive pancreatic dysfunction. The development of PPC was also more common and earlier in ACP patients, which may related to the recurrent episodes of acute pancreatitis attack [8]. Although there's no significant difference in the development of pancreatic stone and biliary stricture after the onset of CP, pancreatic stone and biliary stricture developed much faster in ACP patients after the diagnosis of CP [43]. As for pancreatic cancer development, no significant difference was observed between ACP and ICP patients. In consideration of endocrine and exocrine destruction, PPC, biliary stricture, and pancreatic stone development, it seems ACP patients usually have a more severe course of CP.

The development of DM and steatorrhea were compared between ACP and ICP after the diagnosis of pancreatic stone. The incidence of steatorrhea in ACP patients increased steeply from 15.9% before to 27.8% within 5 years from onset of pancreatic stone. This indicates a rather close correlation between exocrine insufficiency and pancreatic stone. However, the correlation was much less marked in ICP patients since onset of pancreatic stone preceded exocrine insufficiency in 9.7% of patients by up to 10 years. A similar phenomenon can be observed about pancreatic endocrine insufficiency. Thus it appears that the dynamics of progression of endocrine and exocrine insufficiency and of pancreatic stones differ markedly between ACP and ICP patients.

Our study has some limitations. First, the retrospectively acquired data collected between 2000 and 2004 might introduce recall bias. Nevertheless, statistical analysis showed that there was no significant difference between the clinical characteristics of patients admitted before and after January 2005. In this sense, the recall bias minimally influenced the results of the study. Second, 603 CP patients were followed up for less than 2 years after the diagnosis of CP; among these patients, several pancreatic cancer patients may have been misdiagnosed as CP. However, these limitations minimally influence the results considering the relatively large sample size of the study.

In conclusion, ACP and ICP have many features in common. However, the long-term profile of these two groups differs in some important aspects, particularly in the pain attack, morphology, and development of complications. It seems ACP patients usually have a more severe course of CP. These differences should be recognized in the diagnosis and treatment of CP. Lifestyle modification like abstinence may benefit the ACP patients.

## Author Contributions

**Conceptualization:** Zhuan Liao, Zhao-Shen Li, Liang-Hao Hu.

**Data curation:** Li-Sheng Wang, Teng Wang, Hong-Lei Guo, Ting-Ting Du, Di Zhang, Xiang-Peng Zeng, Wen-Bin Zou, Hui Chen, Ting Xie, Bai-Rong Li, Zhuan Liao, Zhao-Shen Li.

**Formal analysis:** Lu Hao, Teng Wang, Hong-Lei Guo, Jun Pan, Dan Wang.

**Funding acquisition:** Li-Sheng Wang, Lei Xin, Bai-Rong Li, Zhi-Jie Cong, Liang-Hao Hu.

**Investigation:** Jun Pan, Ya-Wei Bi, Liang-Hao Hu.

**Methodology:** Lu Hao, Yu Liu, Zheng-Lei Xu, Zhao-Shen Li.

**Project administration:** Zhao-Shen Li, Liang-Hao Hu.

**Resources:** Jin-Huan Lin, Zhi-Jie Cong, Zhao-Shen Li.

**Software:** Lu Hao, Yu Liu, Lei Xin, Zheng-Lei Xu.

**Supervision:** Zhao-Shen Li, Liang-Hao Hu.

**Validation:** Lu Hao, Yu Liu, Teng Wang, Wen-Bin Zou, Zheng-Lei Xu.

**Visualization:** Lu Hao, Yu Liu, Jun-Tao Ji, Zheng-Lei Xu.

**Writing – original draft:** Lu Hao, Li-Sheng Wang, Yu Liu, Jin-Huan Lin, Di Zhang, Xiang-Peng Zeng, Wen-Bin Zou, Hui Chen, Ting Xie, Bai-Rong Li, Zhuan Liao, Zhi-Jie Cong, Zheng-Lei Xu.

**Writing – review & editing:** Dan Wang, Liang-Hao Hu.

## References

1. Rickels MR, Bellin M, Toledo FG, Robertson RP, Andersen DK, Chari ST, et al. Detection, evaluation and treatment of diabetes mellitus in chronic pancreatitis: recommendations from PancreasFest 2012. *Pancreatol: official journal of the International Association of Pancreatology (IAP)* [et al]. 2013; 13(4):336–42. Epub 2013/07/31. <https://doi.org/10.1016/j.pan.2013.05.002> PMID: 23890130; PubMed Central PMCID: PMC3830751.
2. Pan J, Xin L, Wang D, Liao Z, Lin JH, Li BR, et al. Risk Factors for Diabetes Mellitus in Chronic Pancreatitis: A Cohort of 2011 Patients. *Medicine*. 2016; 95(14):e3251. Epub 2016/12/07. <https://doi.org/10.1097/md.0000000000003251> PMID: 27922545.
3. Fitzgerald O, Fitzgerald P, Fennelly J, McMullin JP, Boland SJ. A CLINICAL STUDY OF CHRONIC PANCREATITIS. *Gut*. 1963; 4:193–216. Epub 1963/09/01. PMID: 14058261; PubMed Central PMCID: PMC3830751.

4. Howat HT. Chronic pancreatitis. *The Practitioner*. 1963; 191:42–9. Epub 1963/07/01. PMID: [13955141](#).
5. Howat HT. CHRONIC PANCREATITIS. *Lancet* (London, England). 1963; 2(7319):1234–5. Epub 1963/12/07. PMID: [14072968](#).
6. Othersen HB Jr. SURGICAL PALLIATION OF CALCIFIC PANCREATITIS. *The American surgeon*. 1963; 29:521–4. Epub 1963/08/01. PMID: [14061617](#).
7. Tucker DH, Moore IB. Vanishing pancreatic calcification in chronic pancreatitis. A sign of pancreatic carcinoma. *The New England journal of medicine*. 1963; 268:31–3. Epub 1963/01/03. <https://doi.org/10.1056/NEJM196301032680107> PMID: [13994682](#).
8. Ammann RW, Buehler H, Muench R, Freiburghaus AW, Siegenthaler W. Differences in the natural history of idiopathic (nonalcoholic) and alcoholic chronic pancreatitis. A comparative long-term study of 287 patients. *Pancreas*. 1987; 2(4):368–77. Epub 1987/01/01. PMID: [3628234](#).
9. Ammann RW, Akovbiantz A, Largiader F, Schueler G. Course and outcome of chronic pancreatitis. Longitudinal study of a mixed medical-surgical series of 245 patients. *Gastroenterology*. 1984; 86(5 Pt 1):820–8. Epub 1984/05/01. PMID: [6706066](#).
10. Layer P, DiMaggio EP. Early and late onset in idiopathic and alcoholic chronic pancreatitis. Different clinical courses. *The Surgical clinics of North America*. 1999; 79(4):847–60. Epub 1999/09/02. PMID: [10470331](#).
11. Wang LW, Li ZS, Li SD, Jin ZD, Zou DW, Chen F. Prevalence and clinical features of chronic pancreatitis in China: a retrospective multicenter analysis over 10 years. *Pancreas*. 2009; 38(3):248–54. Epub 2008/11/27. <https://doi.org/10.1097/MPA.0b013e31818f6ac1> PMID: [19034057](#).
12. Hao L, Pan J, Wang D, Bi YW, Ji JT, Xin L, et al. Risk factors and nomogram for pancreatic pseudocysts in chronic pancreatitis: A cohort of 1998 patients. *Journal of gastroenterology and hepatology*. 2017; 32(7):1403–11. Epub 2017/01/28. <https://doi.org/10.1111/jgh.13748> PMID: [28127800](#).
13. Rosch T, Daniel S, Scholz M, Huibregtse K, Smits M, Schneider T, et al. Endoscopic treatment of chronic pancreatitis: a multicenter study of 1000 patients with long-term follow-up. *Endoscopy*. 2002; 34(10):765–71. Epub 2002/09/24. <https://doi.org/10.1055/s-2002-34256> PMID: [12244496](#).
14. Diener MK, Huttner FJ, Kieser M, Knebel P, Dorr-Harim C, Distler M, et al. Partial pancreateoduodenectomy versus duodenum-preserving pancreatic head resection in chronic pancreatitis: the multicentre, randomised, controlled, double-blind ChroPac trial. *Lancet* (London, England). 2017; 390(10099):1027–37. Epub 2017/09/14. [https://doi.org/10.1016/s0140-6736\(17\)31960-8](https://doi.org/10.1016/s0140-6736(17)31960-8) PMID: [28901935](#).
15. Xin L, He YX, Zhu XF, Zhang QH, Hu LH, Zou DW, et al. Diagnosis and treatment of autoimmune pancreatitis: experience with 100 patients. *Hepatobiliary & pancreatic diseases international: HBPD INT*. 2014; 13(6):642–8. Epub 2014/12/06. PMID: [25475868](#).
16. Li BR, Pan J, Du TT, Liao Z, Ye B, Zou WB, et al. Risk Factors for Steatorrhea in Chronic Pancreatitis: A Cohort of 2,153 Patients. *Scientific reports*. 2016; 6:21381. Epub 2016/02/16. <https://doi.org/10.1038/srep21381> PMID: [26877248](#); PubMed Central PMCID: PMC4753434.
17. Hao L, Zeng XP, Xin L, Wang D, Pan J, Bi YW, et al. Incidence of and risk factors for pancreatic cancer in chronic pancreatitis: A cohort of 1656 patients. *Dig Liver Dis*. 2017; 49(11):1249–56. <https://doi.org/10.1016/j.dld.2017.07.001> PMID: [28756974](#).
18. Hao L, Bi YW, Zhang D, Zeng XP, Xin L, Pan J, et al. Risk Factors and Nomogram for Common Bile Duct Stricture in Chronic Pancreatitis: A Cohort of 2153 Patients. *Journal of clinical gastroenterology*. 2017. Epub 2017/09/30. <https://doi.org/10.1097/MCG.0000000000000930> PMID: [28961573](#).
19. Sun XT, Hu LH, Xia T, Shi LL, Sun C, Du YQ, et al. Clinical Features and Endoscopic Treatment of Chinese Patients With Hereditary Pancreatitis. *Pancreas*. 2015; 44(1):59–63. Epub 2014/07/25. <https://doi.org/10.1097/MPA.0000000000000198> PMID: [25058887](#).
20. Li BR, Liao Z, Du TT, Ye B, Zou WB, Chen H, et al. Risk factors for complications of pancreatic extracorporeal shock wave lithotripsy. *Endoscopy*. 2014; 46(12):1092–100. Epub 2014/09/25. <https://doi.org/10.1055/s-0034-1377753> PMID: [25251205](#).
21. Li BR, Hu LH, Li ZS. Chronic pancreatitis and pancreatic cancer. *Gastroenterology*. 2014; 147(2):541–2. Epub 2014/07/01. <https://doi.org/10.1053/j.gastro.2014.03.054> PMID: [24979529](#).
22. Malde DJ, Oliveira-Cunha M, Smith AM. Pancreatic carcinoma masquerading as groove pancreatitis: case report and review of literature. *JOP: Journal of the pancreas*. 2011; 12(6):598–602. Epub 2011/11/11. PMID: [22072250](#).
23. Lu WF. ERCP and CT diagnosis of pancreas divisum and its relation to etiology of chronic pancreatitis. *World journal of gastroenterology*. 1998; 4(2):150–2. Epub 2002/01/31. <https://doi.org/10.3748/wjg.v4.i2.150> PMID: [11819261](#); PubMed Central PMCID: PMC4688639.
24. Howes N, Lerch MM, Greenhalf W, Stocken DD, Ellis I, Simon P, et al. Clinical and genetic characteristics of hereditary pancreatitis in Europe. *Clinical gastroenterology and hepatology: the official clinical*



- practice journal of the American Gastroenterological Association. 2004; 2(3):252–61. Epub 2004/03/16. PMID: [15017610](#).
25. Yadav D, Pitchumoni CS. Issues in hyperlipidemic pancreatitis. *Journal of clinical gastroenterology*. 2003; 36(1):54–62. Epub 2002/12/19. PMID: [12488710](#).
  26. Schreyer AG, Jung M, Riemann JF, Niessen C, Pregler B, Grenacher L, et al. S3 guideline for chronic pancreatitis—diagnosis, classification and therapy for the radiologist. *RoFo: Fortschritte auf dem Gebiete der Rontgenstrahlen und der Nuklearmedizin*. 2014; 186(11):1002–8. Epub 2014/08/15. <https://doi.org/10.1055/s-0034-1385005> PMID: [25122174](#).
  27. Ito T, Ishiguro H, Ohara H, Kamisawa T, Sakagami J, Sata N, et al. Evidence-based clinical practice guidelines for chronic pancreatitis 2015. *Journal of gastroenterology*. 2016; 51(2):85–92. Epub 2016/01/05. <https://doi.org/10.1007/s00535-015-1149-x> PMID: [26725837](#).
  28. Tandon RK, Sato N, Garg PK. Chronic pancreatitis: Asia-Pacific consensus report. *Journal of gastroenterology and hepatology*. 2002; 17(4):508–18. Epub 2002/05/02. PMID: [11982735](#).
  29. Lankisch PG, Seidensticker F, Lohr-Happe A, Otto J, Creutzfeldt W. The course of pain is the same in alcohol- and nonalcohol-induced chronic pancreatitis. *Pancreas*. 1995; 10(4):338–41. Epub 1995/05/01. PMID: [7792289](#).
  30. Li ZS, Wang W, Liao Z, Zou DW, Jin ZD, Chen J, et al. A long-term follow-up study on endoscopic management of children and adolescents with chronic pancreatitis. *The American journal of gastroenterology*. 2010; 105(8):1884–92. Epub 2010/03/11. <https://doi.org/10.1038/ajg.2010.85> PMID: [20216535](#).
  31. Chen Q, Yang L, Xiao Y, Zhu J, Li Z. Circulating microRNA-182 in plasma and its potential diagnostic and prognostic value for pancreatic cancer. *Medical oncology (Northwood, London, England)*. 2014; 31(11):225. Epub 2014/10/20. <https://doi.org/10.1007/s12032-014-0225-z> PMID: [25326859](#).
  32. Ma Y, Zhou W, He S, Xu W, Xiao J. Tyrosine kinase inhibitor sunitinib therapy is effective in the treatment of bone metastasis from cancer of unknown primary: Identification of clinical and immunohistochemical biomarkers predicting survival. *International journal of cancer*. 2016; 139(6):1423–30. <https://doi.org/10.1002/ijc.30176> PMID: [27164264](#).
  33. Bang UC, Benfield T, Hyldstrup L, Bendtsen F, Beck Jensen JE. Mortality, cancer, and comorbidities associated with chronic pancreatitis: a Danish nationwide matched-cohort study. *Gastroenterology*. 2014; 146(4):989–94. Epub 2014/01/07. <https://doi.org/10.1053/j.gastro.2013.12.033> PMID: [24389306](#).
  34. Bellin MD, Whitcomb DC, Abberbock J, Sherman S, Sandhu BS, Gardner TB, et al. Patient and Disease Characteristics Associated With the Presence of Diabetes Mellitus in Adults With Chronic Pancreatitis in the United States. *The American journal of gastroenterology*. 2017; 112(9):1457–65. <https://doi.org/10.1038/ajg.2017.181> PMID: [28741615](#).
  35. Dani R, Penna FJ, Nogueira CE. Etiology of chronic calcifying pancreatitis in Brazil: a report of 329 consecutive cases. *International journal of pancreatology: official journal of the International Association of Pancreatology*. 1986; 1(5–6):399–406. Epub 1986/12/01. <https://doi.org/10.1007/bf02801872> PMID: [3681031](#).
  36. Hirota M, Shimosegawa T, Masamune A, Kikuta K, Kume K, Hamada S, et al. The seventh nationwide epidemiological survey for chronic pancreatitis in Japan: clinical significance of smoking habit in Japanese patients. *Pancreatology: official journal of the International Association of Pancreatology (IAP) [et al.]*. 2014; 14(6):490–6. <https://doi.org/10.1016/j.pan.2014.08.008> PMID: [25224249](#).
  37. Hu LH, Ye B, Yang YG, Ji JT, Zou WB, Du TT, et al. Extracorporeal Shock Wave Lithotripsy for Chinese Patients With Pancreatic Stones: A Prospective Study of 214 Cases. *Pancreas*. 2016; 45(2):298–305. Epub 2015/09/30. <https://doi.org/10.1097/MPA.0000000000000464> PMID: [26418906](#).
  38. Li BR, Liao Z, Du TT, Ye B, Chen H, Ji JT, et al. Extracorporeal shock wave lithotripsy is a safe and effective treatment for pancreatic stones coexisting with pancreatic pseudocysts. *Gastrointestinal endoscopy*. 2016; 84(1):69–78. Epub 2015/11/07. <https://doi.org/10.1016/j.gie.2015.10.026> PMID: [26542375](#).
  39. Balakrishnan V, Unnikrishnan AG, Thomas V, Choudhuri G, Veeraraju P, Singh SP, et al. Chronic pancreatitis. A prospective nationwide study of 1,086 subjects from India. *JOP: Journal of the pancreas*. 2008; 9(5):593–600. PMID: [18762690](#).
  40. Midha S, Khajuria R, Shastri S, Kabra M, Garg PK. Idiopathic chronic pancreatitis in India: phenotypic characterisation and strong genetic susceptibility due to SPINK1 and CFTR gene mutations. *Gut*. 2010; 59(6):800–7. Epub 2010/06/17. <https://doi.org/10.1136/gut.2009.191239> PMID: [20551465](#).
  41. Midha S, Singh N, Sachdev V, Tandon RK, Joshi YK, Garg PK. Cause and effect relationship of malnutrition with idiopathic chronic pancreatitis: prospective case-control study. *Journal of gastroenterology and hepatology*. 2008; 23(9):1378–83. Epub 2008/06/17. <https://doi.org/10.1111/j.1440-1746.2008.05459.x> PMID: [18554234](#).



42. Kloppel G. Chronic pancreatitis, pseudotumors and other tumor-like lesions. *Modern pathology: an official journal of the United States and Canadian Academy of Pathology, Inc.* 2007; 20 Suppl 1:S113–31. Epub 2007/05/09. <https://doi.org/10.1038/modpathol.3800690> PMID: 17486047.
43. Layer P, Yamamoto H, Kalthoff L, Clain JE, Bakken LJ, DiMagno EP. The different courses of early- and late-onset idiopathic and alcoholic chronic pancreatitis. *Gastroenterology.* 1994; 107(5):1481–7. Epub 1994/11/01. PMID: 7926511.
44. Ammann RW, Buehler H, Bruehlmann W, Kehl O, Muench R, Stamm B. Acute (nonprogressive) alcoholic pancreatitis: prospective longitudinal study of 144 patients with recurrent alcoholic pancreatitis. *Pancreas.* 1986; 1(3):195–203. Epub 1986/01/01. PMID: 3575305.
45. Girdwood AH, Marks IN, Bornman PC, Kottler RE, Cohen M. Does progressive pancreatic insufficiency limit pain in calcific pancreatitis with duct stricture or continued alcohol insult? *Journal of clinical gastroenterology.* 1981; 3(3):241–5. Epub 1981/09/01. PMID: 7288117.
46. Ammann RW, Heitz PU, Kloppel G. Course of alcoholic chronic pancreatitis: a prospective clinicomorphological long-term study. *Gastroenterology.* 1996; 111(1):224–31. Epub 1996/07/01. PMID: 8698203.
